# A flow extension tethered particle motion assay for single-molecule proteolysis

Andrew A. Drabek, Joseph J. Loparo\*, and Stephen C. Blacklow\*

Department of Biological Chemistry and Molecular Pharmacology, Harvard Medical School, Boston, Massachusetts 02115, USA

\*To whom correspondence should be addressed. E-mail: [joseph\\_loparo@hms.harvard.edu](mailto:joseph_loparo@hms.harvard.edu) and [stephen\\_blacklow@hms.harvard.edu](mailto:stephen_blacklow@hms.harvard.edu)

## **Abstract**

Regulated proteolysis of signaling proteins under mechanical tension enables cells to communicate with their environment in a variety of developmental and physiologic contexts. The role of force in inducing proteolytic sensitivity has been explored using magnetic tweezers at the single-molecule level with bead-tethered assays, but such efforts have been limited by challenges in ensuring that beads are not restrained by multiple tethers. Here, we describe a multiplexed assay for single-molecule proteolysis that overcomes the multiple-tether problem using a flow extension (FLEX) strategy on a microscope equipped with magnetic tweezers. Particle tracking and computational sorting of flow-induced displacements allows assignment of tethered substrates into singly-captured and multiply-tethered bins, with the fraction of fully mobile, single-tethered substrates depending inversely on the concentration of substrate loaded on the coverslip. Computational exclusion of multiply-tethered beads enables robust assessment of on-target proteolysis by the highly specific tobacco etch virus protease and the more promiscuous metalloprotease ADAM17. This method should be generally applicable to a wide range of proteases and readily extensible to robust evaluation of proteolytic sensitivity as a function of applied magnetic force.

## **Introduction**

Force-dependent proteolysis of tension-sensing domains is a fundamental mechanism for signal transduction in biology<sup>1-4</sup>. For example, in response to shear forces in the vasculature, von Willebrand Factor undergoes proteolysis in its force-sensing domain to regulate blood clotting<sup>5</sup>. At sites of cell-cell contact, a

mechanosensing domain in the Notch receptor undergoes regulated proteolysis in response to tension applied by bound ligand, influencing cell fate decisions during development<sup>6-7</sup>. In the cellular response to the extracellular matrix, force-induced cleavage of talin is essential for mechanosensation and the adhesion response<sup>8</sup>.

Given the importance of force-dependent proteolysis in biological signaling, we sought to develop a robust, single-molecule assay for proteolytic cleavage that can be readily adapted for probing proteolytic sensitivity in response to force. In this regard, single-molecule magnetic tweezers methods enable direct, multiplexed observations of tension-dependent biochemical processes, in cell-based assays or in purified systems *in vitro*<sup>9</sup>. These approaches typically rely on the capture of a substrate between a probe and anchor surface, normally a colloidal bead and glass coverslip, respectively. One problem that can confound these assays is the simultaneous capture of one bead by more than one immobilized substrate molecule, the so called “multiple-tether problem,” which has not been directly accounted for in previous multiplexed single-molecule proteolysis studies<sup>6, 10</sup>.

To address the multiple tethering problem, Dekker and coworkers used micropatterning to separate anchor points based on the contour length of a simple DNA substrate. Although the approach enriches for single tethers, it does not eliminate multiply tethered particles<sup>11</sup>. In studying unzipping of DNA nanoswitches, Wong and colleagues used tethered particle motion and a length change signature to perform sorting for centrifugal force spectroscopy<sup>12</sup>. This approach is highly specialized, however, and requires complex custom instrumentation that is not yet commercially available.

We present here a simple, readily accessible approach to identify monovalently tethered substrates for single-molecule enzymology and force spectroscopy, and apply our method to visualize single-molecule proteolysis in real time using a standard, inverted microscope equipped with magnetic tweezers (Figure 1). We capture beads onto chip-bound protease

substrates in a microfluidic chamber, and computationally sort tracked substrate-tethered beads that are flow-stretched, showing that characteristic displacements under flow, or flow extension (FLEX) signatures, are a reliable method to identify beads tethered to a single substrate molecule. We then demonstrate specific proteolysis of bead-tethered substrates for two different classes of proteases. This technique should be a universal approach to sort putative substrates for a wide range of proteases, or other hydrolytic enzymes, and should be applicable to studies investigating proteolytic sensitivity as a function of force as well as to classic force-clamp spectroscopy experiments measuring the strength of adhesion bonds.

## Results

In order to develop a reliable bead-tethered assay for single-molecule proteolysis, we developed an approach that relies on the use of flow extension (FLEX) to distinguish beads tethered to single substrates from beads with multiple tethers or beads that adhere to the flow-cell surface after capture. There are two independent measurements made in this experiment: first, we measure bead displacement in a flow extension assay to

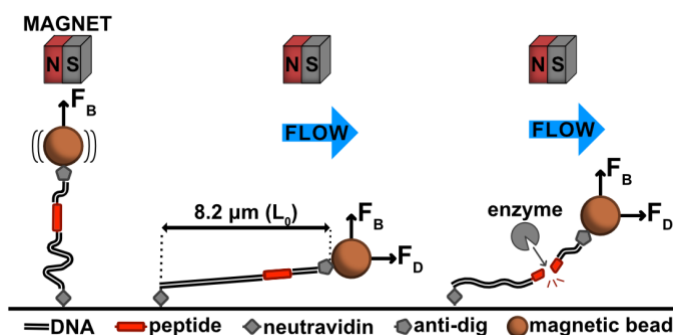

**Figure 1.** Schematic of the flow extension (FLEX) cleavage assay. Details of the FLEX approach are described in the text.  $F_B$ , magnetic force;  $F_D$ , drag force;  $L_0$ , contour length.

distinguish among different tether configurations, and then we measure bead release in a cleavage assay performed with protease (Figure 1). Our substrate contains a long DNA tether with an embedded polypeptide sequence between digoxigenin- and biotin-labeled DNA handles. The substrate is captured on a neutravidin surface using the biotinylated DNA end, and  $\alpha$ -digoxigenin  $F_{ab}$  coated magnetic beads are then tethered to the beads at the digoxigenin-labeled end. This bead-tethered substrate is then used for multiplexed, single-molecule proteolysis (Figure 1).

The assembly of the DNA-conjugated peptide substrate is schematically illustrated in Figure 2. First, we link a single-stranded oligonucleotide to the C-terminal cysteine residue of a fluorescently labeled acceptor peptide using a maleimide-modified nucleotide (1 in Figure 2A and Figure S1). We then couple our substrate peptide to this acceptor-DNA conjugate using evolved Sortase A (SrtA) (2 in Figure 2A and Figure S1). Again using maleimide coupling, a second single-stranded oligonucleotide is attached to the N-terminal cysteine of this protein-DNA conjugate to generate a peptide substrate with single stranded oligonucleotides at each end (3 in Figure 2A and Figure S1). After purification on a size exclusion column, this molecule is then ligated to a short DNA duplex at the N-terminal end, and to an XbaI-cleaved fragment of  $\lambda$  phage (23,998 bp) at the C-terminal end. Ligation of a digoxigenin-modified oligonucleotide to the short duplex, and a biotinylated oligonucleotide to the  $\lambda$  phage fragment results in production of a substrate with a biotin handle for surface attachment and a digoxigenin handle for capture of anti-digoxigenin beads (4 in Figure 2B).

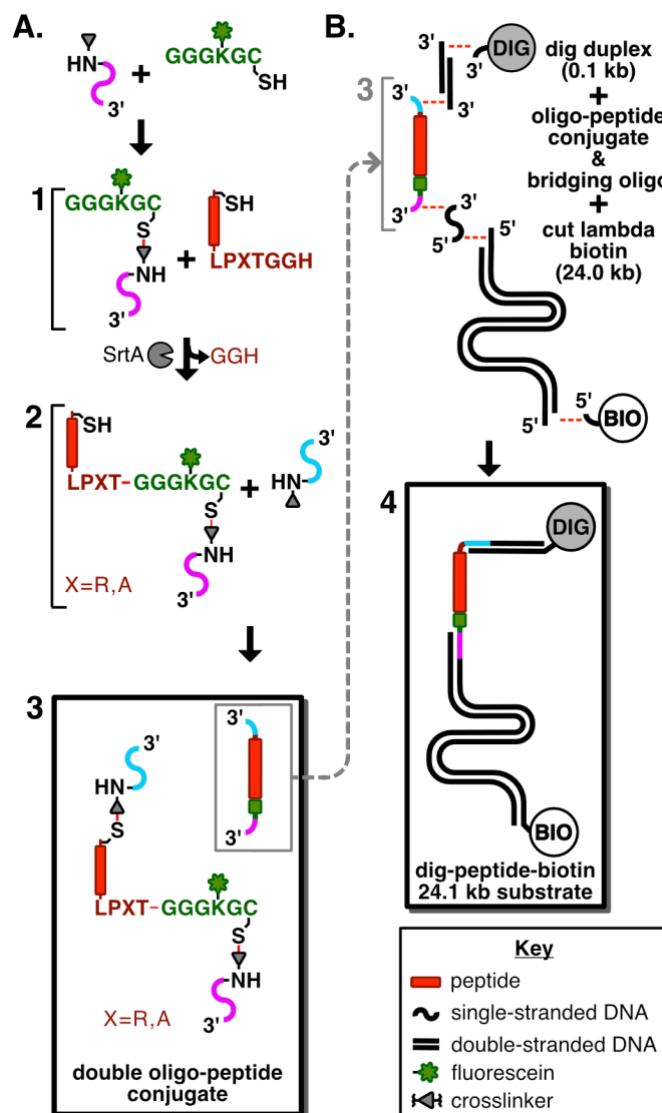

**Figure 2.** Scheme showing the route used to prepare DNA-conjugated peptide substrates for single-molecule proteolysis. A. Synthetic route to the double oligonucleotide-coupled peptide conjugate. Product 1 is a polyglycine conjugate made with a fluoresceinated lysine residue and a C-terminal thiol (green), coupled to a 5'-maleimide-oligo (magenta). Product 2 is the Sortase A-catalyzed conjugation of the substrate peptide containing a C-terminal LPXTG sortase acceptor motif (red) to the polyglycine-oligo (green-magenta). Product 3 (boxed) is the double oligonucleotide peptide conjugate made from linking the N-terminal cysteine of 2 to the 5'-maleimide-oligo (cyan). B. Synthesis of the digoxigenin-peptide-biotin substrate. Product 4 (boxed) is produced by an annealing and ligation reaction of a 5' digoxigenin-containing oligonucleotide, a short (100 bp) DNA duplex and the N-terminal oligonucleotide end of the double oligo-peptide conjugate, along with simultaneous ligation of the C-terminal-end oligonucleotide to the XbaI-cleaved 24.0 kbp fragment of phage  $\lambda$ , and a terminal biotinylated oligonucleotide.

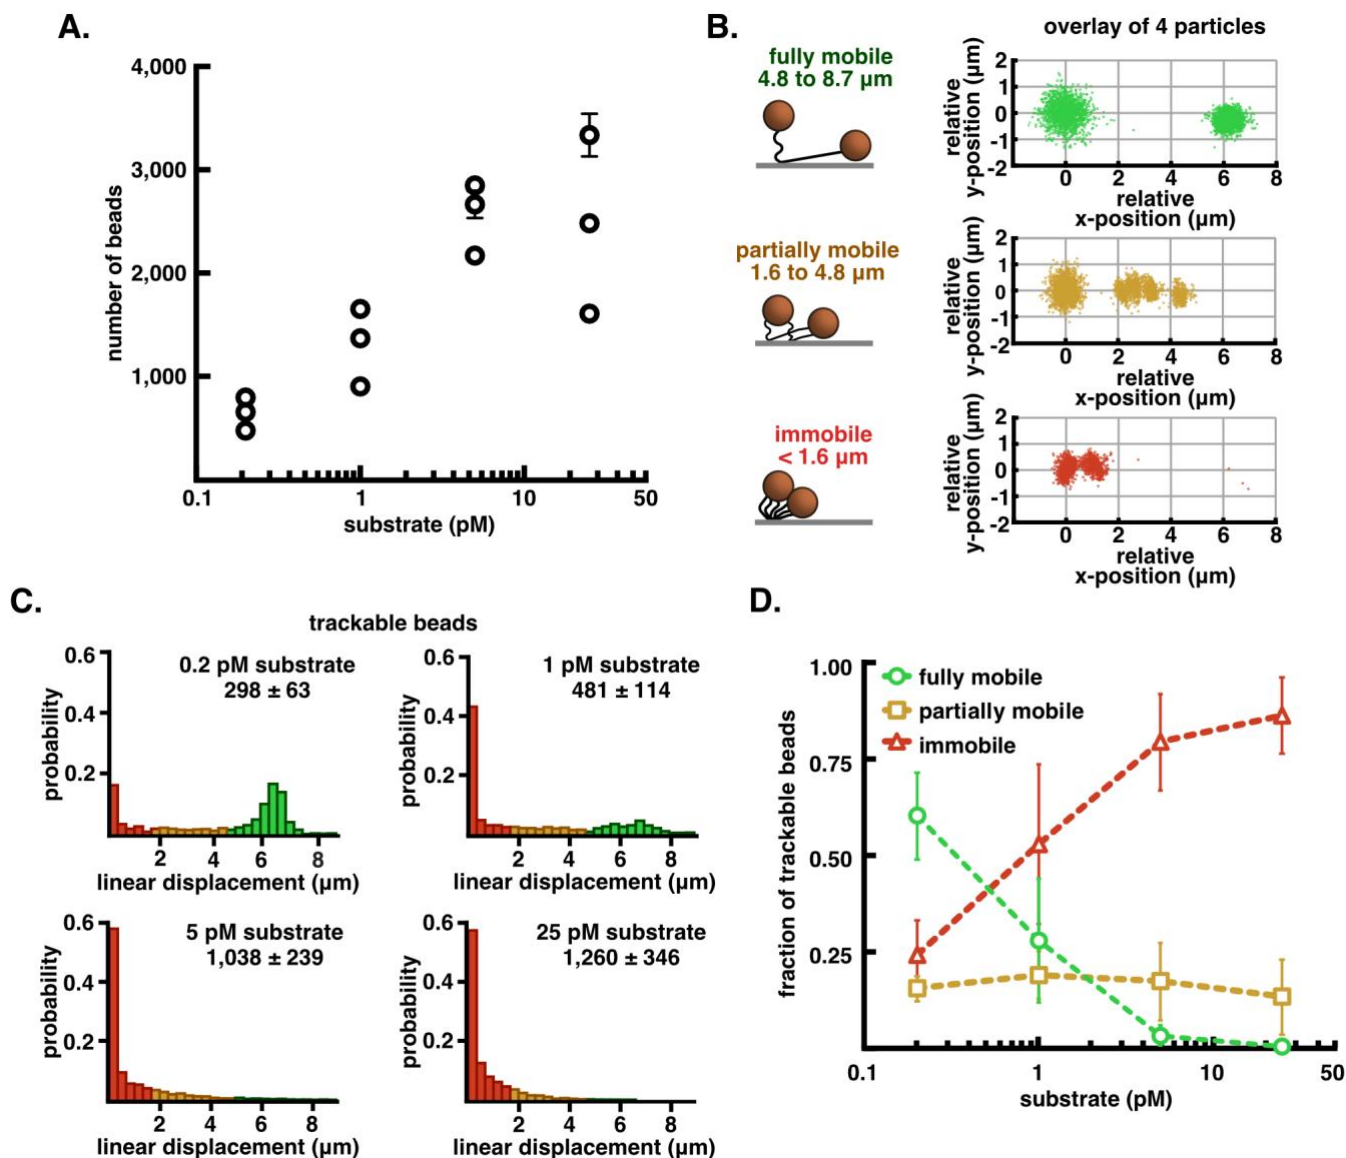

**Figure 3.** Tethered bead movement under flow extension as a function of tether density. A. Semi-log plot of the average number of captured beads in six fields-of-view from flow-chambers incubated with increasing amounts of dig- $\lambda_{\text{XbaI}}$ -biotin (0.2, 1, 5, 25 pM), reported as mean  $\pm$  S.E.M. B. Graphic representation of the three classes of beads that are observed in every experiment alongside an overlay of relative initial ( $t = 0-200$  sec) and extended ( $t = 300-350$  sec) position data from four trajectories from each class of displacement: fully mobile (4.8 - 8.7  $\mu\text{m}$ , green), partially mobile (1.6 - 4.8  $\mu\text{m}$ , orange), and immobile (< 1.6  $\mu\text{m}$ , red). C. Probability normalized histograms of the linear displacement of bead trajectories at increasing amounts of substrate. The number of particle trajectories tracked in 3 replicates (mean  $\pm$  S.E.M.) are listed above each histogram. D. Quantification of the fraction of the total trajectories that were sorted into each class of displacement, reported as mean  $\pm$  S.E.M. See also Table S1.

The final substrate for proteolysis contains a custom peptide embedded between DNA duplexes that together total 24,098 base-pairs and have a maximal extension length ( $L_0$ ) of 8.2  $\mu\text{m}$ , assuming 0.34 nm per base pair and 0.35 nm per amino acid (Figures 1 and 2B). The modular nature of both N- and C-terminal DNA fragments enables the use of numerous surface

attachment strategies and choice of DNA handles of variable lengths on either side of the substrate.

To establish proof-of-concept for the FLEX sorting method and optimize conditions for single-bead capture, we first investigated a control all-DNA tether of comparable length, assembled similarly (Figure S2). We investigated beads captured

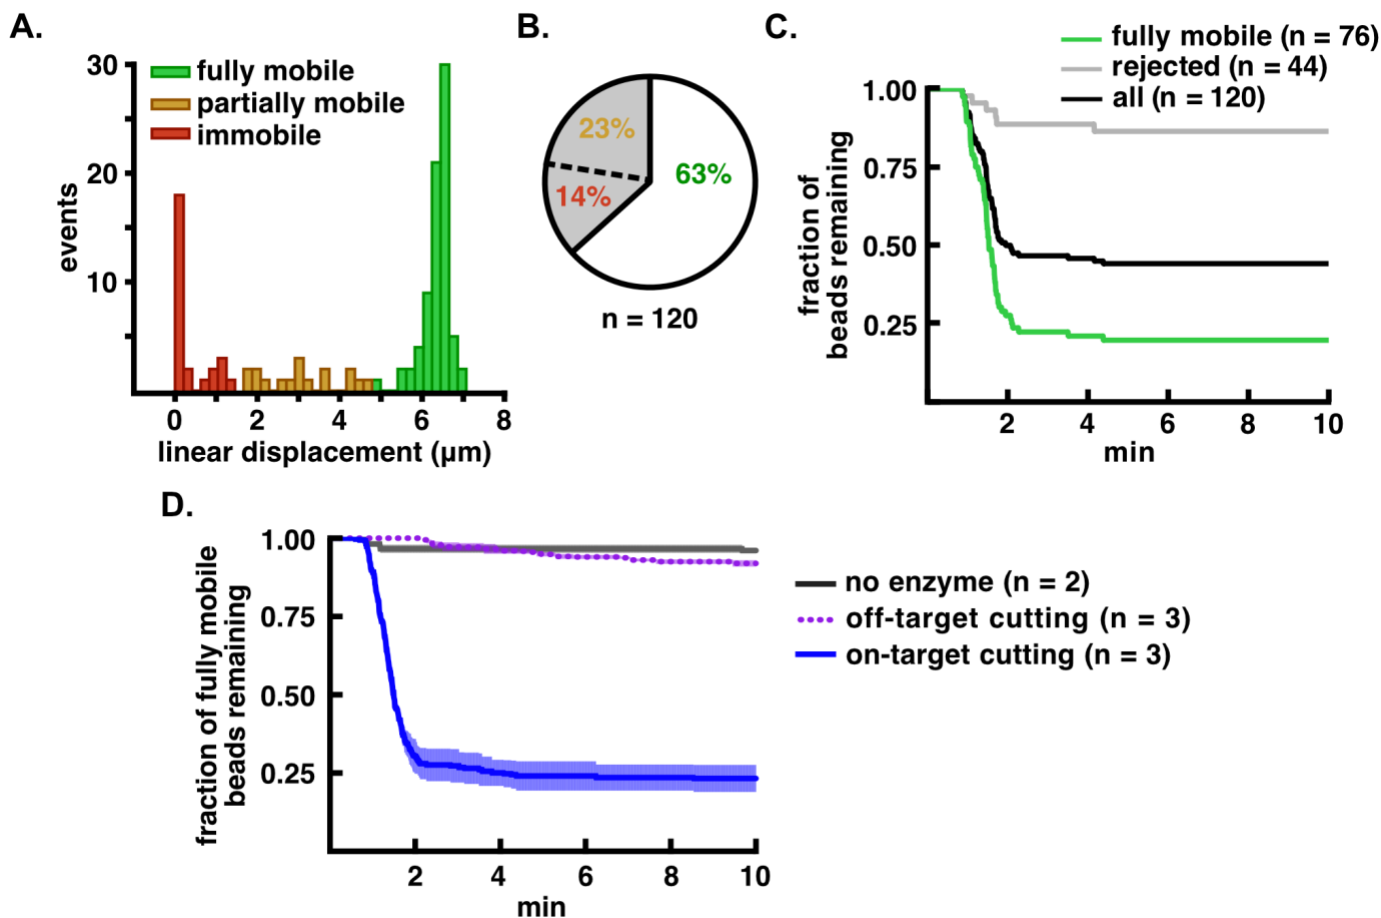

**Figure 4.** Improved analysis of TEV-catalyzed proteolysis using computational sorting of bead mobility. A. Distribution of flow extension distances for bead-tethered, TEV substrate molecules. The fully mobile population is shown in green, partially mobile in orange, and immobile in red. B. Pie chart showing the percentage of accepted, partially mobile, and immobile beads in the tethered population. C. Proteolysis of bead-tethered substrates upon addition of  $20 \mu\text{M}$  TEV protease. The fraction of beads lost is plotted as a function of time for the total population (black), the accepted (fully mobile) population (green), and the rejected population (gray). D. Cleavage specificity analysis. Bead release from cleavage of the tethered peptide substrate is indicated with a blue solid line, release of the tethered all-DNA substrate is indicated with a purple dotted line, and bead release in the absence of enzyme is indicated in gray. Kinetic traces are normalized such that  $t = 0$  min is set to 1 min before the start of bead loss, and are shown as mean  $\pm$  S.E.M for the number of trials indicated ( $n = 2$  or  $n = 3$ ).

onto these control DNA tethers loaded onto the flow cell at four different concentrations, ranging from  $0.2 - 25 \text{ pM}$  (Figure 3A). At each concentration, we performed a FLEX experiment by measuring the position of individual beads in the absence and presence of flow to classify bead trajectories into immobile (extension  $< 1.6 \mu\text{m}$ ), partially mobile (extension between  $1.6 - 4.8 \mu\text{m}$ ), or fully mobile (extension between  $4.8 - 8.7 \mu\text{m}$ ), eliminating clumped beads or trajectories that were incomplete over the flow-extension period (Table S1). The trajectory data show that loading substrates at a concentration of  $0.2 \text{ pM}$  results

in a majority of single beads with full trajectories falling into the fully mobile category, and that a concentration of  $5 \text{ pM}$  or greater results in multiple tethering or immobility of virtually all loaded beads (Figure 3C, D; see also Table S1). For the trajectories that are fully mobile, displacements fit to a normal distribution (Figure 3C and 3D, green population) of  $6.37 \pm 0.54 \mu\text{m}$  (mean  $\pm$  S.D.,  $n = 518$ ). It is also clear that there is an inverse correlation between the fraction of fully mobile and immobile beads as the concentration of tethered beads increases, indicating that as more trajectories are observed there are sufficient bound

substrates to cause multiple tethering for nearly every bead (Figure 3C and 3D). Overall, the bead mobility analysis indicates that the FLEX signature is a robust method to determine whether a bead is tethered to a single substrate molecule.

We next used our FLEX sorting procedure to assess the single-molecule proteolysis of a bead-tethered peptide substrate. For proof-of-concept studies, we assembled a double-DNA conjugated 19-residue peptide substrate (see Figure 2) containing a consensus Tobacco Etch Virus (TEV) protease cleavage site<sup>13</sup> (ENLYFQ/G, with the scissile bond indicated by a backslash), and subjected this substrate to cleavage with TEV (Figure 4). Beads captured on the DNA-peptide substrate show a distribution of FLEX behavior (Figure 4A,B), with 63% of the tethered beads (76/120) being fully mobile. Upon TEV treatment (Figure 4C), the population of tethered substrates (black) shows two kinetic phases and a residual population of approximately 45% of the beads that remain uncleaved after 10 min. Computational sorting of the beads into accepted and rejected beads based on their FLEX trajectories shows that the computationally rejected population (gray) resists specific cleavage by TEV, whereas the fully mobile population (green) shows more complete cleavage with a residual bead population of approximately 20% uncleaved beads after 10 min. The accepted bead population exhibits a rate of decay that is much faster than that of the rejected bead population (Figure 4C, compare gray and green decay curves). Whereas the accepted population of molecules for the specific peptide substrate shows rapid decay with a  $k_{\text{loss}}$  of  $3.09 \pm 0.03 \times 10^{-2} \text{ sec}^{-1}$  ( $n = 3$ , mean  $\pm$  95% CI), the accepted molecules for control bead-tethered substrates that lack peptide or tethered substrates treated with buffer under flow without added TEV exhibit only slow phases of

bead loss that are nearly equivalent ( $k_{\text{loss}} = 3.3 \pm 0.2 \times 10^{-5} \text{ sec}^{-1}$  for the DNA-only control substrate,  $n = 3$  mean  $\pm$  95% CI) likely attributable to dissociation of the anti-digoxigenin/digoxigenin (or neutravidin/biotin) interaction (Figure 4D).

We next tested whether our assay system could be used to investigate proteolysis at the single-molecule level for a less selective protease, ADAM17. ADAM17 catalyzes the cleavage of a number of different proteins involved in intracellular signaling, including the epidermal growth factor precursor, tumor necrosis factor  $\alpha$ , and, under certain pathophysiologic contexts, the force-sensitive substrate human Notch1<sup>14-15</sup>. Unlike TEV, the catalytic domain of ADAM17 does not recognize a highly specific consensus sequence, and is instead capable of cleaving a wide range of substrates with preference only for a bulky aliphatic residue in the P1' position (i.e. Val or Ile)<sup>16-18</sup>.

The ADAM17 substrate contains a ten-residue sequence from human Notch1 (NIPYKIEA/VQS, with the scissile bond indicated by a backslash) that spans the metalloprotease cleavage site (called S2<sup>15, 19</sup>) with additional short flanking sequences embedded between the N- and C-terminal DNA handles (Figure 2). Cleavage of the Notch1 substrate by ADAM17 shows both a fast phase of bead release dependent on the concentration of ADAM17 in the cleavage buffer, followed by a slow phase (Figure 5A). Controls testing for release of tethered beads in the absence of enzyme, for bead release in the presence of both ADAM17 and the metalloprotease inhibitor BB-94, or for release of beads tethered to a DNA-only substrate analog, show a slow phase of non-specific bead detachment, confirming that the fast exponential phase for ADAM17-catalyzed cleavage of the Notch1 substrate is due to specific single-molecule proteolysis. The rate of enzyme-catalyzed bead release

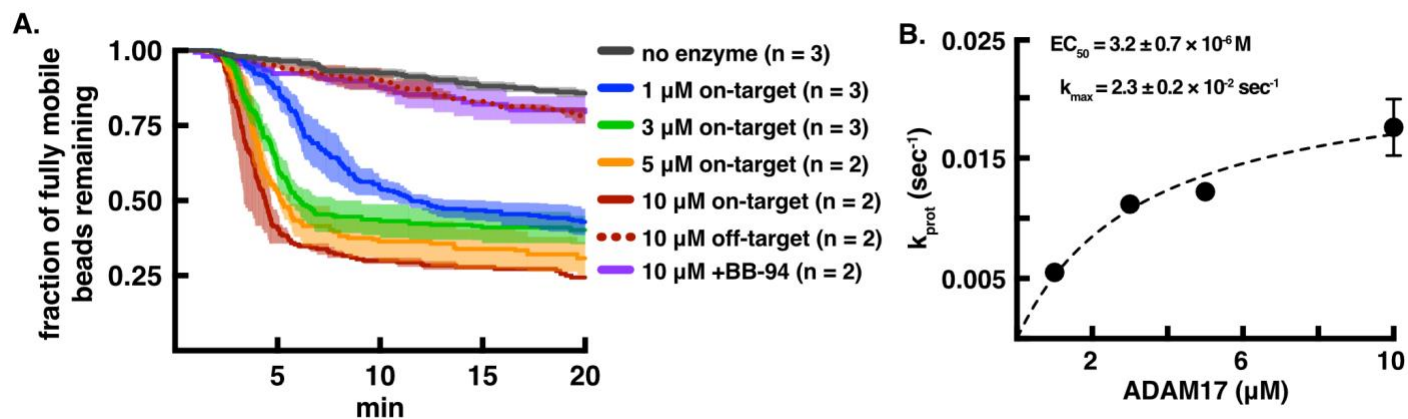

**Figure 5.** Single-molecule proteolysis of a Notch1 substrate by the ADAM17 catalytic domain. A. Plot of beads released as a function of time using different concentrations of enzyme and DNA control (dashed line) or Notch1 peptide substrate (solid lines). A cleavage reaction (at an ADAM17 concentration of 10 μM) performed in the presence of the metalloprotease inhibitor BB94 is shown in purple. B. Fit of the single-molecule cleavage rates from (A) as a function of ADAM17 concentration to the equation  $k_{\text{prot}} = k_{\text{max}} \times [\text{ADAM17}] / (\text{EC}_{50} + [\text{ADAM17}])$ . Kinetic traces are shown as mean  $\pm$  S.E.M for the number of trials indicated ( $n = 2$  or  $n = 3$ ).

plotted as a function of ADAM17 concentration shows saturable kinetics (Figure 5B), with an estimated  $k_{\text{max}}$  of  $2.3 \pm 0.2 \times 10^{-2}$  and EC50 for [ADAM17] of  $3.2 \pm 0.7 \times 10^{-6}$  M (reported as mean  $\pm$  S.E.M., analogous to values for  $k_{\text{cat}}$  and  $K_D$ , as proposed previously<sup>10</sup>).

## Discussion

Here, we report a method that uses flow extension sorting of tethered beads to enable stringent analysis of single-molecule proteolysis for two different enzymes and their substrates. The cleavage rates we observe are consistent with published studies of these enzymes in bulk proteolysis experiments<sup>20-21</sup>. Our approach relies on computational sorting of substrate-tethered beads loaded at low density, using their mobility under flow to exclude immobile or multiply tethered beads and thereby only analyze beads tethered to a single substrate molecule.

In previous studies measuring proteolysis of bead-tethered substrates, approaches to classify different beads within the field of view were not used, and therefore it was not possible to make strong claims about monovalency<sup>6, 10</sup>. Our data show that tether

valency is highly sensitive to the concentration of substrate used for capture in the flow cell. Even when DNA-only molecules are used for the flow-extension analysis, a pronounced increase in fully mobile beads is readily evident as the decrease in grafting density is reduced to the lowest loading concentration (0.2 pM). The FLEX procedure enables empirical optimization of substrate concentration to maintain enough beads for multiplexing statistics while minimizing the population of beads rejected because of surface adsorption or multiple tethering. In the studies reported here, we were able to load all-DNA molecules into the chamber so that as many as 202 fully mobile (of 355 total) DNA-tethered beads were present in a single field of view. Even the double-oligonucleotide conjugate peptide substrates, which are likely to be more adsorption prone because of their embedded peptide sequences, can be delivered to the flow cell at concentrations sufficient to produce 120 fully mobile (of 165 total) substrate-tethered beads in a single field of view. We also note that our empirical data are consistent with statistical predictions about multiple tethering made using an ideal surface model dependent

upon the grafting density of substrates and the sum of tether contour length and bead diameter<sup>22</sup>.

The use of the flow-extension signature to perform computational exclusion of beads that are not held by a single tether results in a demonstrable improvement in the measurement of substrate cleavage kinetics (Figure 4). The approach should be particularly valuable in identifying reaction conditions suitable for investigation of protein or peptide substrates that are prone to adsorption on surfaces. Optimization of reaction conditions can be carried out by selecting blocking conditions and substrate variants that minimize the number of transiently or permanently adsorbed beads, enriching for the fully mobile beads that report faithfully on cleavage of a single substrate molecule during the enzyme-catalyzed reaction.

The assay tools reported here should be readily adaptable for the investigation of any tension dependent hydrolytic reaction, simply by using the magnetic tweezers to vary the magnitude of applied force. Apart from testing mechanosensing domains, our assay can be used to study the stability of peptide and foldamer secondary and tertiary structural elements by investigating the force-dependence of denaturation of such structural elements using proteolytic cleavage as a proxy. Two classes of molecules with changes in cleavage sensitivity can be envisioned: those substrates that have cryptic cleavage sites that are exposed upon denaturation or conformational change<sup>23-24</sup>, or those substrates that only present a productive cleavage site when they fold<sup>25-28</sup>.

The FLEX sorting technique should also be applicable to *in vitro* single-molecule force-spectroscopy. For bond rupture experiments, it is equally important to ensure that only

monovalent interactions are scored to evaluate catch- or flex-bond versus slip-bond behavior<sup>3, 29-30</sup>.

## **Materials and Methods**

### ***Chemicals***

Custom synthesized biopolymers were obtained from Genscript or IDT, and are listed in Table S2 in the Supporting Information. Sulfo-SMCC (sulfosuccinimidyl 4-(N-maleimidomethyl)cyclohexane-1-carboxylate; 22322), and APMA (4-aminophenylmercurial acetate; A9563) were from Sigma. BB-94 or batimastat was from Calbiochem (196440). NeutrAvidin (31000) was from Thermo Fisher. The anti-digoxigenin F<sub>ab</sub> was purchased from Roche (11214667001). Nano-strip was from KMG (210034). Key reagents for the single-molecule working buffer were bovine serum albumin, heat shock fraction (A7906) and Pluronic F-127 (P2443) from Sigma. M-280 Tosyl activated Dynabeads (14203) were from Invitrogen. SDS-PAGE analysis was performed with either Bolt 4-12% Bis-Tris Plus gels (Life Technologies, NW04125BOX) or 4-20% tris-glycine gels (Bio-Rad, 456-1096). Denaturing PAGE of oligonucleotides and their conjugates was performed with Novex 15% TBE-Urea gels (Life Technologies, EC6885BOX). PD-10 desalting columns were from GE (95017-001). P-6 (7326221) and P-30 (7326223) Micro Bio-Spin columns were obtained from Bio-Rad. Lambda (λ) DNA dam(-) was purchased from New England Biolabs (N3013L). 3-aminopropyltrimethoxysilane was purchased from Sigma (281778-100ML). Methyl-PEG5000-succinimidyl valerate (mPEG5000-SVA) and biotin-PEG5000-SVA (bioPEG5000SVA) were acquired from Laysan Biosciences and stored desiccated at -20 C.



### **Enzymes**

T4 polynucleotide kinase (M0201S), T4 DNA ligase (M0202S), XbaI (R0145L), and XhoI (R0146S) were obtained from New England Biolabs. The enhanced activity SrtA pentamutant was expressed and purified from bacteria using the pET29-eSrtA vector (Addgene, #75144) as previously reported<sup>31</sup>. TEV protease was also expressed recombinantly in bacteria using the pTrc-7H-PRO plasmid and purified as described<sup>32</sup>. The catalytic domain of ADAM17 (residues 215-477) was isolated after recombinant expression of its precursor form (1-477) with a C-terminal hexahistidine tag using a baculovirus expression system in insect cells. Purification was carried out in the presence of APMA as described<sup>33</sup>. Enzyme activity was confirmed in bulk solution using a fluorogenic substrate (Mca-PLAQAV-Dpa-RSSSR-NH<sub>2</sub>; R&D systems, ES003)<sup>21</sup>. Enzymes were snap frozen and stored at -80 C in aliquots before use.

### **Custom synthesized biopolymers**

Oligonucleotides listed in Supplementary Table S2 were custom synthesized from Integrated DNA Technologies (IDT). Peptides listed in Supplementary Table S2 were custom synthesized from Genscript and supplied at 95% minimum purity. SMCC-activated amine-oligonucleotides (activated oligonucleotides, Table S2) were produced by mixing sulfo-SMCC (7.5 mM, dissolved in dimethylformamide with 300  $\mu$ M amino-oligonucleotide at 25° C in 10 mM phosphate buffer, pH 7.2, containing 150 mM NaCl (PBS). After a 3-5 h reaction time, the activated oligonucleotide was purified away from residual free crosslinker on a PD-10 desalting column(s) pre-equilibrated in PBS, concentrated on a 3kDa MWCO centrifugal filter, and used immediately for peptide conjugation.

### **Other materials**

Tubing was PE60 (Stoelting, 51162), coverslips were No. 1.5 VistaVision (VWR, 16004-312), double sided tape (Grace Bio-Labs, 620001), and 1 mm quartz tops were from Technical Glass Products.

### **Preparation of coverslips and flow chambers**

No. 1.5 coverslips were prepared by first etching with stabilized piranha solution for 2 h, then silanized with pre-hydrolyzed 3-(aminopropyl)trimethoxysilane in acidic methanol, and passivating by alkylation with PEG<sub>5000</sub>-succinimide containing 2-6 mol% biotinylated PEG<sup>34-35</sup>. Coverslips were stored under vacuum before use. To generate flow cells, 15 x 5 mm channels were cut into double-sided tape, the tape was placed between the coverslip and a glass slide, and inlet and outlet ports were attached to the glass with epoxy as described<sup>34, 36</sup>.

### **Synthesis of double oligonucleotide peptide conjugates**

The oligo-peptide conjugate (1) (Figure 2; oligo-peptide conjugate 1, Table S2) was synthesized by conjugation of the H<sub>2</sub>N-GGK\*GC-COOH (where the K\* residue is  $\epsilon$ -[5-amino-fluorescein (5-FAM)]-Lys) sortase donor peptide to a 5'-maleimide activated 17-base pair oligonucleotide (activated oligonucleotide 1 and peptide-oligo conjugate 1, Table S2)<sup>37</sup>. The conjugation reaction was allowed to proceed for 3 h at 22-25°C in PBS buffer pH 7.2 (10 mM phosphate, 150 mM NaCl) with 1 mM TCEP, containing 2 mM (~15 eq.) peptide 1 (Table S2) and 130  $\mu$ M (1 eq) activated oligonucleotide 1 (Table S2). To purify the conjugate (1) (oligo-peptide conjugate 1, Table S2) from free peptide, the reaction was exchanged into in HBS buffer (25 mM HEPES pH 7.5, 150 mM NaCl) with a gravity desalting column and purified by size-exclusion chromatography to

apparent homogeneity as assessed by TBE-Urea PAGE. The conjugate was stored at -80°C until use.

To produce the oligo-peptide conjugate (**2**) (Figure 2; oligo-peptide conjugates 2-N and 2-T, Table S2), conjugate (**1**) was coupled to the C-terminus of either the Notch S2 peptide (peptide 2, Table S2) or the TEV substrate peptide (peptide 3, Table S2) in a transpeptidation reaction using SrtA. The SrtA transpeptidation was performed over 4 h at 42°C in HBS pH 7.5 with 10 mM MgCl<sub>2</sub> and 4 μM NiCl<sub>2</sub> reaction buffer using 15 μM (1 eq.) of oligo-peptide conjugate **1** (**1**), 150 μM (10 eq.) peptide 2 or 3, and 15 μM (1 eq.) eSrtA, similar to previously reported methods<sup>38-39</sup>. After coupling, the conjugate (**2**) was further purified using a desalting column, which also was used for buffer exchange into HBS [25 mM HEPES pH 7.5, 150 mM NaCl]. Purity was assessed by TBE-Urea PAGE analysis. Conjugate (**2**) was stored at -80°C until use.

The double oligo-peptide conjugate (**3**) was formed by attaching the N-terminal cysteine of conjugate (**2**) to a 5'-maleimide functionalized 20 base-pair oligonucleotide (activated oligonucleotide 2, Table S2), essentially as described above for synthesis of conjugate (**1**) except that activated oligonucleotide 2 was used in vast molar excess during this step. The Notch S2 and TEV double oligo-peptide conjugates (**3**) (Figure 2; oligo-peptide conjugates 3-N and 3-T, respectively, Table S2) were purified using size-exclusion chromatography to apparent homogeneity, as assessed by denaturing TBE-Urea PAGE, and were stored at -80°C.

#### ***Production of duplex DNA single-molecule substrates***

Each double-oligonucleotide peptide conjugate (**3**) was annealed to a bridging oligonucleotide (oligonucleotide 3, Table S2), a 100 base-pair 5'-digoxigenin containing sequence from the pUC19 *ori*

region (oligonucleotides 4, 5, and 6; Table S2), an XbaI digested fragment from the phage λ genome (λ<sub>XbaI</sub>, 23,998 base-pairs, 3.75 nM, at 250 μg scale), and a 3'-biotin cohesive site *cosR* sequence (oligonucleotide 7, Table S2) in 20 mM HEPES buffer, pH 7.5 (annealing temperatures and times were similar to previously published methods<sup>40</sup>). Prior to annealing, all annealed oligonucleotides with free 5' ends were treated with T4 polynucleotide kinase in 1X PNK buffer for 1 hr at 37°C and purified with a Qiagen nucleotide cleanup kit). The annealed assembly was ligated with 0.16 U/μL T4 DNA ligase for 2 hr at room temperature. The fully ligated substrate was purified away from lower molecular weight contaminants (removal of the free biotinylated oligonucleotide is critical) by buffer exchange into HEPES-buffered saline (HBS), pH 7.5, using a centrifugal filter with a molecular weight cutoff of 100 kDa. The all-DNA control substrate was produced using the same assembly and ligation procedure, using a DNA insert (oligonucleotide 8, Table S2) in place of the double oligonucleotide conjugate.

#### ***Substrate capture and bead tethering procedure.***

Flow chambers were mounted on the stage of an Olympus IX51 inverted microscope on an air table (Technical Manufacturing Corporation), with off-axis LED gooseneck illuminator (Fisher), and custom-built magnetic tweezers, as previously described with minor modifications<sup>6</sup>. The chambers were also equipped with a syringe pump (Harvard Apparatus) controlled using a stopcock valve and a 50 mL air spring to regulate fluid flow through the flow-cell. All images were acquired with a QIClick-R-F-M-12 Mono CCD camera (QImaging) controlled with Micro-Manager software<sup>41</sup>.

Prior to capture of substrates on the flow-cell surface, the flow-cell chamber was first treated for a minimum of 10 min with

500  $\mu\text{L}$  blocking buffer (HBS containing 0.5% (w/v) BSA and 1% (w/v) Pluronic F127) drawn manually into the flow cell. Then, the chamber was incubated for 3-5 min with 80  $\mu\text{L}$  of NeutrAvidin (0.1 mg/mL) drawn manually into the chamber, and washed with 500  $\mu\text{L}$  working buffer (HBS containing 0.1% (w/v) BSA and 1% (w/v) Pluronic F127) at a flow-rate of 100  $\mu\text{L}/\text{min}$ . Substrate was diluted into working buffer (0.15 to 15 pM final concentration), and a total volume of 100  $\mu\text{L}$  of substrate was drawn into the chamber first at 20  $\mu\text{L}/\text{min}$  for one min to clear the inlet tubing, and at 5  $\mu\text{L}/\text{min}$  thereafter before incubating in the chamber for an additional 2-5 min. The chamber was then washed with working buffer for 10 min at a flow rate of 50  $\mu\text{L}/\text{min}$ .

To prepare beads for capture, tosyl-activated 2.8  $\mu\text{m}$  Dynabeads were conjugated to anti-digoxigenin  $F_{ab}$ , and stored in PBS with 0.01% (w/v) BSA at 4°C, as described (according to manufacturer's Protocol and Tanner, N. and van Oijen, A. (2010)<sup>34</sup>). Immediately before use, beads were diluted to 10  $\mu\text{g}/\text{mL}$  in working buffer, vortexed, and sonicated to minimize clumping. The suspended beads (~250  $\mu\text{L}$ ) were then drawn into the chamber at 20  $\mu\text{L}/\text{min}$ . The chamber was aligned in the direction of flow to make sure that a bead in motion across the chamber did not move more than half its diameter across the entire field of view (fov). The chamber was then washed with 400  $\mu\text{L}$  of working buffer at 30  $\mu\text{L}/\text{min}$ . After the washing step, the flow was halted to allow beads to relax from their extended position (typically for 5-10 mins). After the syringe pump was turned off, a 5mm NdFeB cube magnet on a hinged mount was positioned at 9 mm above the coverglass with a micrometer (equivalent to approximately 0.6 pN of applied force normal to the coverslip) in order to keep the beads above the surface. Force was estimated with a digoxigenin- $\lambda$ -biotin (48,502 bp, full length prepared as described

in<sup>40</sup>) tether based on the variance in bead position ( $\langle\sigma_y^2\rangle$ ) in the direction transverse to applied force, according to the method published by Strick and colleagues<sup>42</sup>.

### ***Single-molecule flow-extension procedure.***

For proof-of-concept flow extension experiments (Figure 3, supplementary movie V1), additional buffer was added to the inlet after substrate loading and bead capture, and the valve was opened and closed to allow pressure equilibration of the flow cell. Data acquisition was then initiated at 2 frames per second, initially in the absence of flow, but with the magnet in position (Figure 1), to allow determination of the initial position of each tracked bead. At the time of valve opening (at  $t = 200$  sec), the buffer was drawn into the chamber at 5  $\mu\text{L}/\text{min}$  using a syringe pump to induce flow-extension. The extension under flow reaches equilibrium at approximately 4 min. At the 5 min time point, the position of the bead at extension was recorded.

### ***Analysis and sorting of flow extension bead profiles.***

Time-lapse data sets were analyzed with custom MATLAB scripts written for this work, available upon request. Detected particles were identified and analyzed with colloidal particle tracking algorithms developed by Cocker, J.C. and Grier, D.G.<sup>43</sup> that were adapted for MATLAB by Kilfoil, M.<sup>44</sup>. The trajectories of monodisperse particles were inspected manually to ensure high-quality tracking output, using the msdalyzer suite created by Tinevez, J.-Y.<sup>45</sup>.

The flow-extension trajectory of each monodisperse bead was analyzed to determine its linear displacement. Specifically, only bead trajectories that started at the first frame ( $t = 0$  sec) of acquired data and that persisted through the time required for bead extension ( $t = 200$  sec) were scored. The mean initial (0 to

200 sec) and extended (300 to 350 sec) positions were determined by fitting the bead positions to a Gaussian distribution. Linear flow-displacements were calculated by measuring the distance between these mean positions. The displacements were measured to sub-pixel accuracy ( $\sigma_{\sigma_{RMSE}}$ ) and precision ( $\sqrt{\langle \sigma_{x,y}^2 \rangle}$ )<sup>22</sup>.

Based on their mean displacements, the analyzed beads were sorted into accepted (fully mobile [8.7 to 4.8  $\mu\text{m}$ ]) and rejected (partially mobile [4.8 to 1.6  $\mu\text{m}$ ] and immobile [1.6 to 0  $\mu\text{m}$ ]) populations. The histogram of displacements for a population of tethered substrates was always inspected to qualitatively assess the character of the distribution relative to the fraction in each population. The mean extension for a high-quality fully mobile population was typically between 6.0 – 6.5  $\mu\text{m}$  ( $L/L_0 = 0.73 - 0.79$ ) assuming  $L_0 = 8.20$ .

#### ***Single-molecule proteolysis with TEV.***

Immediately before use, TEV protease was buffer-exchanged into TEV cutting buffer (25 mM HEPES pH 7.5, 25 mM NaCl, and 0.01%(w/v) Pluronic F-127) with a P-6 spin column to remove residual TCEP present during storage, and then diluted to a concentration of 20  $\mu\text{M}$  before introduction into the flow cell. After substrate loading and bead capture, TEV was introduced into the flow cell at 5  $\mu\text{L}/\text{min}$  and bead trajectories were monitored for assignment into mobile, partially mobile, or immobile categories. The field of view was then monitored for bead loss as a function of time to produce the cleavage plots in Figure 4 (see also supplementary movie V2).

#### ***Single-molecule proteolysis with ADAM17.***

ADAM17 was diluted to the appropriate concentration into metalloprotease cutting buffer (HBS with 4  $\mu\text{M}$   $\text{ZnCl}_2$  and 1%(w/v) Pluronic F-127) immediately before use, and flowed into the chamber to generate the cleavage plots in Figure 5. Flow of enzyme into the chamber was halted after ~25 min, but trajectories were tracked for a total of 45 min to extract the rate constant for the slow exponential phase. To confirm that cleavage was due to ADAM17, the metalloprotease inhibitor BB-94 was used at 20  $\mu\text{M}$ .

#### ***Curve-fitting for cleavage data.***

Bead loss curves were fit to a double exponential using non-linear least squares fitting, where the fast rate constant corresponds to  $k_{\text{prot}}$ . The start of bead loss was determined for each curve by manual inspection. For bead loss curves measured in the absence of enzyme or with inhibitor present, fits were to a single exponential over a time course of 15 min. For ADAM17 experiments, a plot of  $k_{\text{prot}}$  as a function of enzyme concentration was fit to:

$$k_{\text{prot}} = \frac{k_{\text{max}} \cdot [\text{E}]}{\text{EC}_{50} + [\text{E}]} \quad (1)$$

to extract  $k_{\text{max}}$  and  $\text{EC}_{50}$ , which are analogous to  $k_{\text{cat}}$  and  $K_D$ , as described previously<sup>10</sup>.

#### **ASSOCIATED CONTENT**

The Supporting Information is available free of charge on the ACS Publications website, and includes the following:

- 1) Supporting Figures S1 and S2, Supporting Tables S1 and S2,

Legends for Supporting Movies V1 and V2, combined into a single PDF file.

2) Supporting Movies V1 and V2 (file type AVI)

## **AUTHOR INFORMATION**

### **Corresponding Author**

\*To whom correspondence should be addressed. E-mail:

[joseph\\_loparo@hms.harvard.edu](mailto:joseph_loparo@hms.harvard.edu)

and

[stephen\\_blacklow@hms.harvard.edu](mailto:stephen_blacklow@hms.harvard.edu)

### **Author Contributions**

Project conception: all authors; experimental design: all authors; data acquisition, A.A.D.; data interpretation and analysis: all authors; manuscript preparation: all authors; funding: S.C.B. and J.J.L.

### **Funding Sources**

Supported by grants for the NIH (R35 CA200340 to S.C.B. and R01 GM114065 to J.J.L.). S.C.B. receives research funding for an unrelated project from Novartis, and is a consultant on an unrelated project for IFM Therapeutics.

## **ACKNOWLEDGMENTS**

The authors are grateful to Tom C. M. Seegar for providing the baculovirus used for ADAM17 production, Andrew Moreno for help with coding, and both Thomas G. W. Graham and Dan Song for help with flow cell preparation. This work is supported by NIH R35 CA220340 (to S.C.B.) and R01 GM114065 (to J.J.L.).

## **References**

1. Ingber, D. E., Tensegrity: the architectural basis of cellular mechanotransduction. *Annu Rev Physiol* **1997**, *59* (1), 575-599.
2. Bustamante, C.; Bryant, Z.; Smith, S. B., Ten years of tension: single-molecule DNA mechanics. *Nature* **2003**, *421* (6921), 423-7.
3. Liu, B.; Chen, W.; Zhu, C., Molecular force spectroscopy on cells. *Annu Rev Phys Chem* **2015**, *66*, 427-51.
4. Sachs, F., Mechanical Transduction and the Dark Energy of Biology. *Biophys J* **2018**, *114* (1), 3-9.
5. Zhang, X.; Halvorsen, K.; Zhang, C. Z.; Wong, W. P.; Springer, T. A., Mechanoenzymatic cleavage of the ultralarge vascular protein von Willebrand factor. *Science* **2009**, *324* (5932), 1330-4.
6. Gordon, W. R.; Zimmerman, B.; He, L.; Miles, L. J.; Huang, J.; Tiyanont, K.; McArthur, D. G.; Aster, J. C.; Perrimon, N.; Loparo, J. J.; Blacklow, S. C., Mechanical Allostery: Evidence for a Force Requirement in the Proteolytic Activation of Notch. *Dev Cell* **2015**, *33* (6), 729-36.
7. Langridge, P. D.; Struhl, G., Epsin-Dependent Ligand Endocytosis Activates Notch by Force. *Cell* **2017**, *171* (6), 1383-1396 e12.
8. Saxena, M.; Chagede, R.; Hone, J.; Wolfenson, H.; Sheetz, M. P., Force-Induced Calpain Cleavage of Talin Is Critical for Growth, Adhesion Development, and Rigidity Sensing. *Nano Lett* **2017**, *17* (12), 7242-7251.
9. Vilfan, I. D.; Lipfert, J.; Koster, D. A.; Lemay, S. G.; Dekker, N. H., Magnetic Tweezers for Single-Molecule Experiments.

- In *Handbook of Single-Molecule Biophysics*, 2009; pp 371-395.
10. Adhikari, A. S.; Chai, J.; Dunn, A. R., Mechanical load induces a 100-fold increase in the rate of collagen proteolysis by MMP-1. *J Am Chem Soc* **2011**, *133* (6), 1686-9.
  11. De Vlaminck, I.; Henighan, T.; van Loenhout, M. T.; Pfeiffer, I.; Huijts, J.; Kerssemakers, J. W.; Katan, A. J.; van Langen-Suurling, A.; van der Drift, E.; Wyman, C.; Dekker, C., Highly parallel magnetic tweezers by targeted DNA tethering. *Nano Lett* **2011**, *11* (12), 5489-93.
  12. Yang, D.; Ward, A.; Halvorsen, K.; Wong, W. P., Multiplexed single-molecule force spectroscopy using a centrifuge. *Nat Commun* **2016**, *7*, 11026.
  13. Carrington, J. C.; Dougherty, W. G., A viral cleavage site cassette: identification of amino acid sequences required for tobacco etch virus polyprotein processing. *Proc Natl Acad Sci U S A* **1988**, *85* (10), 3391-3395.
  14. Moss, M. L.; Jin, S. L.; Milla, M. E.; Bickett, D. M.; Burkhardt, W.; Carter, H. L.; Chen, W. J.; Clay, W. C.; Didsbury, J. R.; Hassler, D.; Hoffman, C. R.; Kost, T. A.; Lambert, M. H.; Leesnitzer, M. A.; McCauley, P.; McGeehan, G.; Mitchell, J.; Moyer, M.; Pahel, G.; Rocque, W.; Overton, L. K.; Schoenen, F.; Seaton, T.; Su, J. L.; Becherer, J. D.; et al., Cloning of a disintegrin metalloproteinase that processes precursor tumour-necrosis factor- $\alpha$ . *Nature* **1997**, *385* (6618), 733-6.
  15. Brou, C.; Logeat, F.; Gupta, N.; Bessia, C.; LeBail, O.; Doedens, J. R.; Cumano, A.; Roux, P.; Black, R. A.; Israël, A., A novel proteolytic cleavage involved in Notch signaling: the role of the disintegrin-metalloprotease TACE. *Molecular Cell* **2000**, *5* (2), 207-216.
  16. Caescu, C. I.; Jeschke, G. R.; Turk, B. E., Active-site determinants of substrate recognition by the metalloproteinases TACE and ADAM10. *Biochem J* **2009**, *424* (1), 79-88.
  17. Mohan, M. J.; Seaton, T.; Mitchell, J.; Howe, A.; Blackburn, K.; Burkhardt, W.; Moyer, M.; Patel, I.; Waitt, G. M.; Becherer, J. D., The Tumor Necrosis Factor- $\alpha$  Converting Enzyme (TACE): A Unique Metalloproteinase with Highly Defined Substrate Selectivity. *Biochemistry* **2002**, *41* (30), 9462-9469.
  18. Tucher, J.; Linke, D.; Koudelka, T.; Cassidy, L.; Tredup, C.; Wichert, R.; Pietrzik, C.; Becker-Pauly, C.; Tholey, A., LC-MS based cleavage site profiling of the proteases ADAM10 and ADAM17 using proteome-derived peptide libraries. *J Proteome Res* **2014**, *13* (4), 2205-14.
  19. Mumm, J. S.; Schroeter, E. H.; Saxena, M. T.; Griesemer, A.; Tian, X.; Pan, D.; Ray, W. J.; Kopan, R., A ligand-induced extracellular cleavage regulates  $\gamma$ -secretase-like proteolytic activation of Notch1. *Molecular Cell* **2000**, *5* (2), 197-206.
  20. Stawikowska, R.; Cudic, M.; Giulianotti, M.; Houghten, R. A.; Fields, G. B.; Minond, D., Activity of ADAM17 (a disintegrin and metalloprotease 17) is regulated by its noncatalytic domains and secondary structure of its substrates. *J Biol Chem* **2013**, *288* (31), 22871-9.
  21. Minond, D.; Cudic, M.; Bionda, N.; Giulianotti, M.; Maida, L.; Houghten, R. A.; Fields, G. B., Discovery of novel inhibitors of a disintegrin and metalloprotease 17 (ADAM17) using

- glycosylated and non-glycosylated substrates. *J Biol Chem* **2012**, *287* (43), 36473-87.
22. Yin, H.; Landick, R.; Gelles, J., Tethered particle motion method for studying transcript elongation by a single RNA polymerase molecule. *Biophysical journal* **1994**, *67* (6), 2468-2478.
23. Stanger, H. E.; Gellman, S. H., Rules for Antiparallel  $\beta$ -Sheet Design: D-Pro-Gly Is Superior to L-Asn-Gly for  $\beta$ -Hairpin Nucleation1. *J Am Chem Soc* **1998**, *120* (17), 4236-4237.
24. Cline, L. L.; Waters, M. L., The structure of well-folded beta-hairpin peptides promotes resistance to peptidase degradation. *Biopolymers* **2009**, *92* (6), 502-7.
25. Zasloff, M., Magainins, a class of antimicrobial peptides from *Xenopus* skin: isolation, characterization of two active forms, and partial cDNA sequence of a precursor. *Proc Natl Acad Sci U S A* **1987**, *84* (15), 5449-5453.
26. Resnick, N. M.; Maloy, W. L.; Guy, H. R.; Zasloff, M., A novel endopeptidase from *Xenopus* that recognizes  $\alpha$ -helical secondary structure. *Cell* **1991**, *66* (3), 541-554.
27. Bayer, P.; Arndt, A.; Metzger, S.; Mahajan, R.; Melchior, F.; Jaenicke, R.; Becker, J., Structure determination of the small ubiquitin-related modifier SUMO-1. *J Mol Biol* **1998**, *280* (2), 275-286.
28. Mossessova, E.; Lima, C. D., Ulp1-SUMO crystal structure and genetic analysis reveal conserved interactions and a regulatory element essential for cell growth in yeast. *Molecular Cell* **2000**, *5* (5), 865-876.
29. Thomas, W. E.; Trintchina, E.; Forero, M.; Vogel, V.; Sokurenko, E. V., Bacterial adhesion to target cells enhanced by shear force. *Cell* **2002**, *109* (7), 913-923.
30. Kim, J.; Zhang, C.-Z.; Zhang, X.; Springer, T. A., A mechanically stabilized receptor–ligand flex-bond important in the vasculature. *Nature* **2010**, *466* (7309), 992.
31. Dorr, B. M.; Ham, H. O.; An, C.; Chaikof, E. L.; Liu, D. R., Reprogramming the specificity of sortase enzymes. *Proc Natl Acad Sci U S A* **2014**, *111* (37), 13343-8.
32. Parks, T. D.; Howard, E. D.; Wolpert, T. J.; Arp, D. J.; Dougherty, W. G., Expression and purification of a recombinant tobacco etch virus NIa proteinase: biochemical analyses of the full-length and a naturally occurring truncated proteinase form. *Virology* **1995**, *210*, 194-194.
33. Milla, M. E.; Leesnitzer, M. A.; Moss, M. L.; Clay, W. C.; Carter, H. L.; Miller, A. B.; Su, J.-L.; Lambert, M. H.; Willard, D. H.; Sheeley, D. M., Specific sequence elements are required for the expression of functional tumor necrosis factor- $\alpha$ -converting enzyme (TACE). *Journal of Biological Chemistry* **1999**, *274* (43), 30563-30570.
34. Tanner, N. A.; van Oijen, A. M., Visualizing DNA Replication at the Single-Molecule Level. In *Single Molecule Tools, Part B: Super-Resolution, Particle Tracking, Multiparameter, and Force Based Methods*, 2010; pp 259-278.
35. Chandradoss, S. D.; Haagsma, A. C.; Lee, Y. K.; Hwang, J. H.; Nam, J. M.; Joo, C., Surface passivation for single-molecule protein studies. *J Vis Exp* **2014**, (86).
36. Gambino, S.; Mousley, B.; Cathcart, L.; Winship, J.; Loparo, J. J.; Price, A. C., A single molecule assay for measuring site-specific DNA cleavage. *Anal Biochem* **2016**, *495*, 3-5.
37. Hermanson, G. T., *Bioconjugate Techniques*. 3 ed.; Academic Press: 2013.

38. David Row, R.; Roark, T. J.; Philip, M. C.; Perkins, L. L.; Antos, J. M., Enhancing the efficiency of sortase-mediated ligations through nickel-peptide complex formation. *Chem Commun (Camb)* **2015**, 51 (63), 12548-51.
39. Levary, D. A.; Parthasarathy, R.; Boder, E. T.; Ackerman, M. E., Protein-protein fusion catalyzed by sortase A. *PLoS ONE* **2011**.
40. Kim, H.; Loparo, J. J., Multistep assembly of DNA condensation clusters by SMC. *Nat Commun* **2016**, 7, 10200.
41. Edelstein, A. D.; Tsuchida, M. A.; Amodaj, N.; Pinkard, H.; Vale, R. D.; Stuurman, N., Advanced methods of microscope control using muManager software. *J Biol Methods* **2014**, 1 (2).
42. Strick, T. R.; Allemand, J. F.; Bensimon, D.; Bensimon, A.; Croquette, V., The elasticity of a single supercoiled DNA molecule. *Science* **1996**, 271 (5257), 1835-1837.
43. Crocker, J. C.; Grier, D. G., Methods of digital video microscopy for colloidal studies. *J Colloid Interface Sci* **1996**.
44. Pelletier, V.; Gal, N.; Fournier, P.; Kilfoil, M. L., Microrheology of microtubule solutions and actin-microtubule composite networks. *Phys Rev Lett* **2009**, 102 (18), 188303.
45. Tarantino, N.; Tinevez, J. Y.; Crowell, E. F.; Boisson, B.; Henriques, R.; Mhlanga, M.; Agou, F.; Israel, A.; Laplantine, E., TNF and IL-1 exhibit distinct ubiquitin requirements for inducing NEMO-IKK supramolecular structures. *J Cell Biol* **2014**, 204 (2), 231-45.



## Supporting Information

# A flow extension tethered particle motion assay for single-molecule proteolysis

**Andrew A. Drabek, Joseph J. Loparo\*, and Stephen C. Blacklow\***

Department of Biological Chemistry and Molecular Pharmacology, Harvard Medical School, Boston, Massachusetts  
02115, USA

\*To whom correspondence should be addressed. E-mail: [joseph\\_loparo@hms.harvard.edu](mailto:joseph_loparo@hms.harvard.edu) and  
[stephen\\_blacklow@hms.harvard.edu](mailto:stephen_blacklow@hms.harvard.edu)

### Contents

Supporting Tables S1-S2, Figures S1-S2, Legends for Supporting Movies V1-V2.

Supporting Information for Drabek *et al.*, 23 Jan 2019 – preprint copy - BioRxiv

**Table S1. Relationship between DNA substrate binding density and trajectory mobility**

| <b>[substrate],<br/>pM</b> | <b>Total beads per<br/>fov, count*</b> | <b>Trackable<br/>trajectories per fov,<br/>count*</b> | <b>Fully mobile<br/>trajectories*</b> |
|----------------------------|----------------------------------------|-------------------------------------------------------|---------------------------------------|
| 0.2                        | 641 ± 93                               | 298 ± 63                                              | 60.3 ± 6.5%                           |
| 1                          | 1,308 ± 218                            | 418 ± 114                                             | 27.9 ± 9.3%                           |
| 5                          | 2,561 ± 202                            | 1,038 ± 239                                           | 3.2 ± 1.4%                            |
| 25                         | 2,475 ± 409                            | 1,206 ± 346                                           | 0.3 ± 0.1%                            |

\*n = 3, reported as mean ± S.E.M.

**Table S2. Peptides, oligonucleotides<sup>a</sup>, oligonucleotide-peptide conjugates<sup>b</sup>, and fluorogenic peptides used in this study.**

| <i>Biopolymer ID</i>            | <i>Sequence</i>                                                                                            | <i>Description</i>                                                   | <i>Source</i> |
|---------------------------------|------------------------------------------------------------------------------------------------------------|----------------------------------------------------------------------|---------------|
| peptide 1                       | H <sub>2</sub> N-GGG[K-(5-FAM)]GC-COOH                                                                     | Sortase donor peptide with ε-[5-amino-fluorescein (5-FAM)]-Lys (6aa) | Genscript     |
| peptide 2                       | H <sub>2</sub> N-CNIPYKIEAVQSLPATGGH-COOH                                                                  | Human Notch1 S2 containing peptide (19aa)                            | Genscript     |
| peptide 3                       | H <sub>2</sub> N-CGENLYFQGLPRTGGH-COOH                                                                     | TEV consensus containing peptide (16 aa)                             | Genscript     |
| oligo-peptide conjugate 1 (1)   | H <sub>2</sub> N-GGG{K-(5-FAM)}G{C-[SMCC-HN-(oligo 1)-3']}-COOH                                            | Polyglycine-oligonucleotide Sortase donor peptide (6 aa-17 nt)       | This study    |
| oligo-peptide conjugate 2-N (2) | H <sub>2</sub> N-CNIPYKIEAVQSLPAT-GGG[K-(5-FAM)]G{C-[SMCC-HN-(oligo 1)-3']}-COOH                           | Notch1 S2 oligo-peptide conjugate, intermediate (20 nt-23 aa-17 nt)  | This study    |
| oligo-peptide conjugate 2-T (2) | H <sub>2</sub> N-CGENLYFQGLPRT-GGG{K-(5-FAM)}G{C-[SMCC-HN-(oligo 1)-3']}-COOH                              | TEV oligo-peptide conjugate, intermediate (20 nt-19 aa-17 nt)        | This study    |
| oligo-peptide-conjugate 3-N (3) | H <sub>2</sub> N-{{3'-(oligo 2)-NH-SMCC}-C}-NIPYKIEAVQSLPAT-GGG{K-(5-FAM)}G{C-(SMCC-HN-(oligo 1)-3')}-COOH | Notch1 S2 double oligo-peptide conjugate (20 nt-23 aa-17 nt)         | This study    |
| oligo-peptide conjugate 3-T     | H <sub>2</sub> N-{{3'-(oligo 2)-NH-SMCC}-C}-GENLYFQGLPRTGGG{K-(5-                                          | TEV double oligo-peptide conjugate                                   | This study    |

Supporting Information for Drabek *et al.*, 23 Jan 2019 – preprint copy - BioRxiv

|                                |                                                                        |                                                                                                                                         |            |
|--------------------------------|------------------------------------------------------------------------|-----------------------------------------------------------------------------------------------------------------------------------------|------------|
| (3)                            | FAM)]G{C-[SMCC-HN-(oligo 1)-3']]-<br>COOH                              | (20 nt-19 aa-17 nt)                                                                                                                     |            |
| oligonucleotide 1              | /5AmMC6/GTAAAACGACGGCCAGT                                              | 5'-amino-<br>oligonucleotide, from<br>M13F sequencing<br>primer (17 nt)                                                                 | IDT        |
| activated<br>oligonucleotide 1 | 4-( <i>N</i> -maleimidomethyl)-cyclohexane-<br>1-amide-HN-5'-(oligo 1) | 5'-maleimide-<br>oligonucleotide 1 (17<br>nt)                                                                                           | This study |
| oligonucleotide 2              | /5AmMC6/G*TCAGAGGTGGCGAAA<br>CCC                                       | 5'-amino-<br>oligonucleotide,<br>derived from pUC19<br>vector ori (19 nt) *<br>indicates<br>phosphoramidite bond                        | IDT        |
| activated<br>oligonucleotide 2 | 4-( <i>N</i> -maleimidomethyl)-cyclohexane-<br>1-amide-HN-5'-(oligo 2) | 5'-maleimide-<br>oligonucleotide 2 (20<br>nt)                                                                                           | This study |
| oligonucleotide 3              | CTAGACTGGCCGTCGTTTTAC                                                  | 5' XbaI overhang-<br>containing bridging<br>oligonucleotide,<br>contains the reverse-<br>complement to M13F<br>primer (oligo 1) (21 nt) | IDT        |
| oligonucleotide 4              | /5DigN/CAGGGTCGGAACAGGAGA<br>GC                                        | 5'-digoxigenin-<br>oligonucleotide from the<br>pUC19 ori, HPLC<br>purified<br>(20 nt)                                                   | IDT        |
| oligonucleotide 5              | GCTTAATTAACGACAGGACTATAA<br>AGATACCAGGCGTTTCCCCCTGG                    | Forward strand of the<br>100 bp duplex from                                                                                             | IDT        |

Supporting Information for Drabek *et al.*, 23 Jan 2019 – preprint copy - BioRxiv

|                   |                                                                                             |                                                                                                                                                       |     |
|-------------------|---------------------------------------------------------------------------------------------|-------------------------------------------------------------------------------------------------------------------------------------------------------|-----|
|                   | AAGCTCCCTCGTGCGCTCTCCTGT<br>TCCGACCCTG                                                      | pUC19 ori, with 3' overhang<br>complimentary to dig-oligonucleotide 4, contains a unique PacI site (81 nt)                                            |     |
| oligonucleotide 6 | GCACGAGGGAGCTTCCAGGGGGA<br>AACGCCTGGTATCTTTATAGTCCT<br>GTCGTTAATTAAGCGGTTTCGCCA<br>CCTCTGAC | Reverse strand of the 100 bp duplex from pUC19 ori with 3' overhang<br>complimentary to oligonucleotides 2 and 8, contains a unique PacI site (80 nt) | IDT |
| oligonucleotide 7 | GGGCGGCGACCT/3BioTEG/                                                                       | 3'-biotin-oligonucleotide from $\lambda$ phage cohesive site, cosR (12 nt)                                                                            | IDT |
| oligonucleotide 8 | CTAGGTCAGAGGTGGCGAAACCC                                                                     | 5' XbaI overhang-containing bridging oligonucleotide from pUC19 vector ori, for the all-DNA substrate (23 nt)                                         | IDT |

<sup>a</sup> Listed 5' to 3'. Purified by desalting except where HPLC purification is indicated.

<sup>b</sup> SMCC: the portion remaining after Sulfo-SMCC reaction with an amino oligo (R<sub>1</sub>) and cysteine (C) containing peptide (R<sub>2</sub>).

Supporting Information for Drabek *et al.*, 23 Jan 2019 – preprint copy - BioRxiv

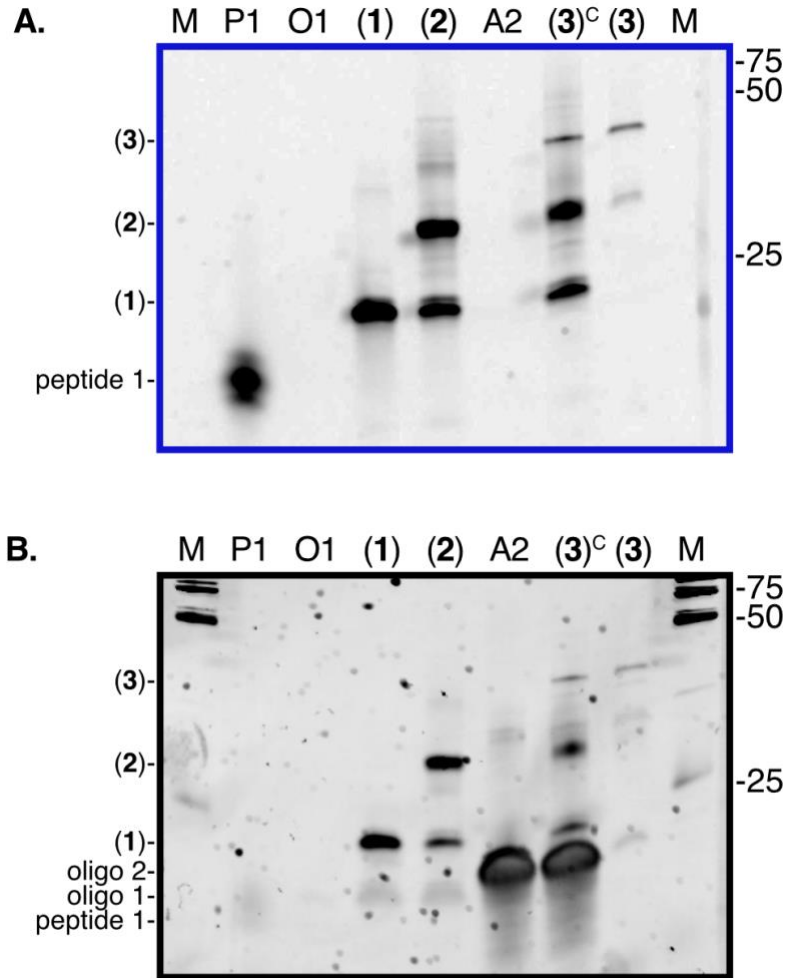

**Figure S1. SDS-PAGE analysis of the double oligo-peptide conjugate intermediate for TEV cleavage.** 15% TBE-Urea PAGE analysis showing: (A) in gel fluorescence of an unstained gel to detect the fluorescein label, and (B) in gel UV excitation fluorescence, of a SybrSafe stained gel to enable DNA detection. Abbreviations above lanes: M, low MW DNA marker (NEB); P1, peptide 1; O1, oligonucleotide 1; (1) oligo-peptide conjugate 1; (2) partially purified oligo-peptide conjugate 2-T; A2, activated oligonucleotide 2; (3)<sup>C</sup> crude double oligo-peptide conjugate 3-T; (3) double oligo-peptide conjugate 3-T.

Supporting Information for Drabek *et al.*, 23 Jan 2019 – preprint copy - BioRxiv

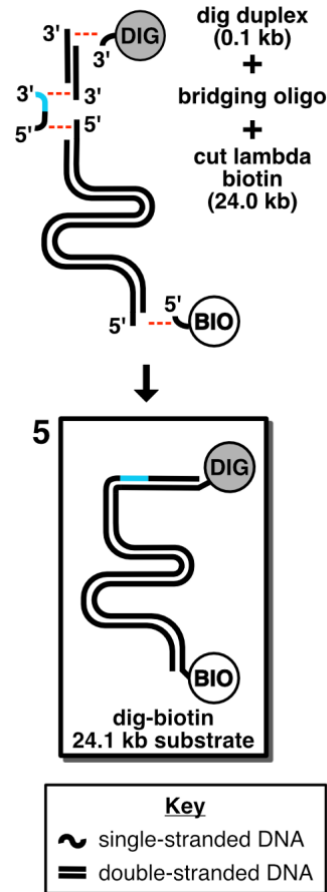

**Figure S2. Scheme for assembly of DNA-only control substrate.** Product (5) (boxed) is produced by annealing and ligation of a 5' digoxigenin-containing oligonucleotide, a short (100 bp) DNA duplex, a bridging oligonucleotide (oligonucleotide 8, cyan and black), the XbaI-cleaved 24.5 kbp fragment of phage  $\lambda$ , and a terminal biotinylated oligonucleotide.

Supporting Information for Drabek *et al.*, 23 Jan 2019 – preprint copy - BioRxiv

Legends for Supporting Movies V1 and V2

**Supporting Movie V1. Flow extension of all-DNA substrate (5) captured at 0.2 pM.** The frame rate is 45 fps. Scale bar is 10 microns. Flow is from left to right. Flow starts at ~8 sec.

**Supporting Movie V2. Single molecule proteolysis of TEV consensus DNA-peptide conjugate (4) with TEV protease.** The frame rate is 45 fps. Scale bar is 10 microns. Flow is from left to right. Flow starts at ~8 sec. Cleavage starts at ~16 sec.
